# Supplementary material for: Isolation, characterisation, and genome sequencing of Rhodococcus equi: a novel strain producing chitin deacetylase
Source: PubMed Central journal article supplement (PMC7062688; doi:10.1038/s41598-020-61349-9), 2020-03-09
Supplement: 41598_2020_61349_MOESM1_ESM.pdf [file 41598_2020_61349_MOESM1_ESM.pdf]

**Isolation, characterisation, and genome sequencing of *Rhodococcus equi*: a novel strain**

**producing chitin deacetylase**

Qinyuan Ma<sup>1#</sup>, Xiuzhen Gao<sup>2#</sup>, Xinyu Bi<sup>1</sup>, Linna Tu<sup>1</sup>, Menglei Xia<sup>1</sup>, Yanbing Shen<sup>1\*</sup>, Min Wang<sup>1\*</sup>

<sup>1</sup>*Key Laboratory of Industrial Fermentation Microbiology (Tianjin University of Science & Technology), Ministry of Education, Tianjin Key Lab of Industrial Microbiology, College of Biotechnology, Tianjin University of Science and Technology, Tianjin 300457, P. R. China*

<sup>2</sup>*School of Life Science, Shandong University of Technology, Zibo 255049, China*

<sup>#</sup>These authors contributed equally to this work.

\*Corresponding authors:

Min Wang: Tel.: 086 22 60600045; Fax: 086 22 60602298; E-mail: minw@tust.edu.cn

Yanbing Shen: Tel.: 086 22 60600045; Fax: 086 22 60602298; E-mail: shenyb@tust.edu.cn

**Supplementary Table S1**

## CDA enzymatic activities of different colonies

| Soil sample collection sites                                                                          | Strain | Primary screen                       | Secondary screen           |
|-------------------------------------------------------------------------------------------------------|--------|--------------------------------------|----------------------------|
|                                                                                                       | number | (Relative size of the yellow circle) | (Enzymatic activity, U/ml) |
| Under trees in Fujia village, Fengjia town, Zhanhua county, Binzhou<br>city, Shandong province, China | A1     | +                                    | 4.19 ± 0.42                |
|                                                                                                       | A10    | ++                                   | 8.29 ± 0.69                |
|                                                                                                       | A21    | +                                    | 3.22 ± 0.36                |
| A small bamboo forests in Xiazhuang town, Rongcheng city, Weihai,<br>Shandong province, China         | F2     | +++                                  | 18.28 ± 1.75               |
|                                                                                                       | F3     | +++                                  | 16.37 ± 1.03               |
|                                                                                                       | F6     | +++                                  | 36.22 ± 3.72               |
|                                                                                                       | F23    | +++                                  | 31.03 ± 2.91               |
|                                                                                                       | F26    | +++                                  | 27.63 ± 2.22               |

---

|                                                                                                                                         |     |     |                  |
|-----------------------------------------------------------------------------------------------------------------------------------------|-----|-----|------------------|
| Under the piers of trestle, Yantai city, Shandong province, China                                                                       | H13 | ++  | $1.26 \pm 0.27$  |
| Beside a river, Yandian town, Yanzhou city, Shandong province,<br>China                                                                 | I14 | ++  | $6.27 \pm 0.69$  |
| Under a tree in the park of Northeastern University in Shenyang,<br>Liaoning province, China                                            | J2  | ++  | $5.28 \pm 0.44$  |
|                                                                                                                                         | M1  | ++  | $5.86 \pm 0.83$  |
|                                                                                                                                         | M4  | +++ | $14.27 \pm 1.52$ |
| In flowers on both sides of Yantai road in Xi 'an, Shanxi, China                                                                        | M6  | +++ | $16.03 \pm 0.96$ |
|                                                                                                                                         | M7  | +++ | $23.37 \pm 3.10$ |
| In the woods on campus of Southwest Jiaotong University, No. 999<br>Xixian'an road, Danan county, Chengdu city, Sichuan province, China | O   | +   | $4.21 \pm 0.57$  |

---

+, Weakly positive; ++, Positive; +++, Strongly positive

**Supplementary Table S2**

Biochemical and physiological characteristics comparison of strain F6 with some previously described *Rhodococcus* strains

| <i>Rhodococcus</i> species | <i>R.tukisamuensis</i> Mb8 <sup>T</sup> | <i>R.jostii</i> IFO 16295 <sup>T</sup> | <i>R. pyridinivorans</i> PDB9 <sup>T</sup> | <i>R.maanshanensis</i> M712 <sup>T</sup> | <i>R.koreensis</i> DNP505 <sup>T</sup> | <i>R.zopfii</i> T1 <sup>T</sup> | Strain F6      |
|----------------------------|-----------------------------------------|----------------------------------------|--------------------------------------------|------------------------------------------|----------------------------------------|---------------------------------|----------------|
| Characteristic             |                                         |                                        |                                            |                                          |                                        |                                 |                |
|                            | Cream                                   | light pink                             | light orange                               | cream                                    | cream                                  | red to pink                     | light pink     |
| Colonies                   | opaque                                  | opaque                                 | opaque                                     | ND                                       | opaque                                 | ND                              | opaque         |
|                            | irregular edges                         | irregular edges                        | irregular edges and wrinkles               | irregular edges                          | irregular edges                        | wrinkled                        | smooth         |
| Cells                      | rod-shaped to cocci                     | irregular rods to short rods or cocci  | rods to short rods or cocci                | rods to cocci                            | rods to short rods or cocci            | rods to irregular rods or cocci | Distinct cocci |
| pH                         | 5.5-8.5                                 | ND                                     | 6.0-9.0                                    | 6.0-8.5                                  | 6.0-8.0                                | ND                              | 4.0-9.0        |
| Temperature                | 15-45°C                                 | 15-30°C                                | 30-37°C                                    | 25-30°C                                  | 25-30°C                                | ND                              | 25-40°C        |

---

Utilization as sole  
carbon and energy  
source:

|                     |    |    |    |    |    |    |   |
|---------------------|----|----|----|----|----|----|---|
| D-Ribose            | W  | -  | +  | +  | ND | ND | + |
| D-Fructose          | W  | ND | +  | ND | ND | ND | - |
| D-Glucose           | +  | ND | -  | ND | ND | ND | + |
| Sucrose             | +  | -  | ND | +  | ND | -  | - |
| D-Mannitol          | -  | ND | +  | -  | ND | -  | - |
| D-Sorbitol          | -  | ND | +  | -  | ND | -  | - |
| D-Cellobiose        | +  | ND | ND | -  | ND | ND | - |
| D-Arabinose         | -  | ND | ND | ND | ND | ND | - |
| D-Xylose            | -  | ND | -  | -  | +  | ND | + |
| D-Galactose         | +  | ND | ND | +  | +  | ND | - |
| L-Rhamnose          | +  | ND | ND | W  | +  | -  | - |
| Lactose             | -  | ND | ND | -  | +  | ND | - |
| Maltose             | +  | ND | -  | +  | +  | +  | - |
| Melezitose          | +  | ND | ND | ND | +  | ND | - |
| D-Turanose          | +  | ND | ND | +  | +  | -  | - |
| Arabitol            | -  | ND | ND | ND | +  | ND | - |
| myo-Inositol        | -  | ND | ND | -  | +  | -  | - |
| Xylitol             | +  | ND | ND | ND | +  | ND | - |
| Inulin              | +  | ND | ND | -  | +  | ND | - |
| Tween 80            | +  | -  | +  | ND | ND | ND | + |
| N-Acetylglucosamine | ND | +  | ND | ND | ND | ND | - |
| Glycerol            | ND | ND | +  | +  | ND | +  | + |

---

---

References

16

17

18

19

20

21

This work

---

+, Positive; -, negative; W, weakly positive; ND, not determined.

### Supplementary Fig. S1

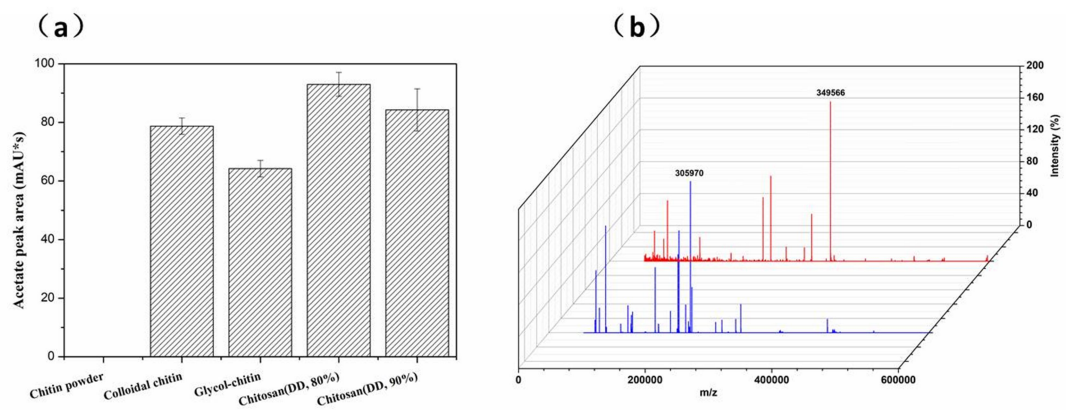

Deacetylation of polymeric chitosans and chitin by crude ReCDA. (a) Acetic acid levels detected by HPLC; (b) MALDI-TOF MS analysis of glycol-chitin and end product hydrolysed by ReCDA.

Supplementary Fig. S2

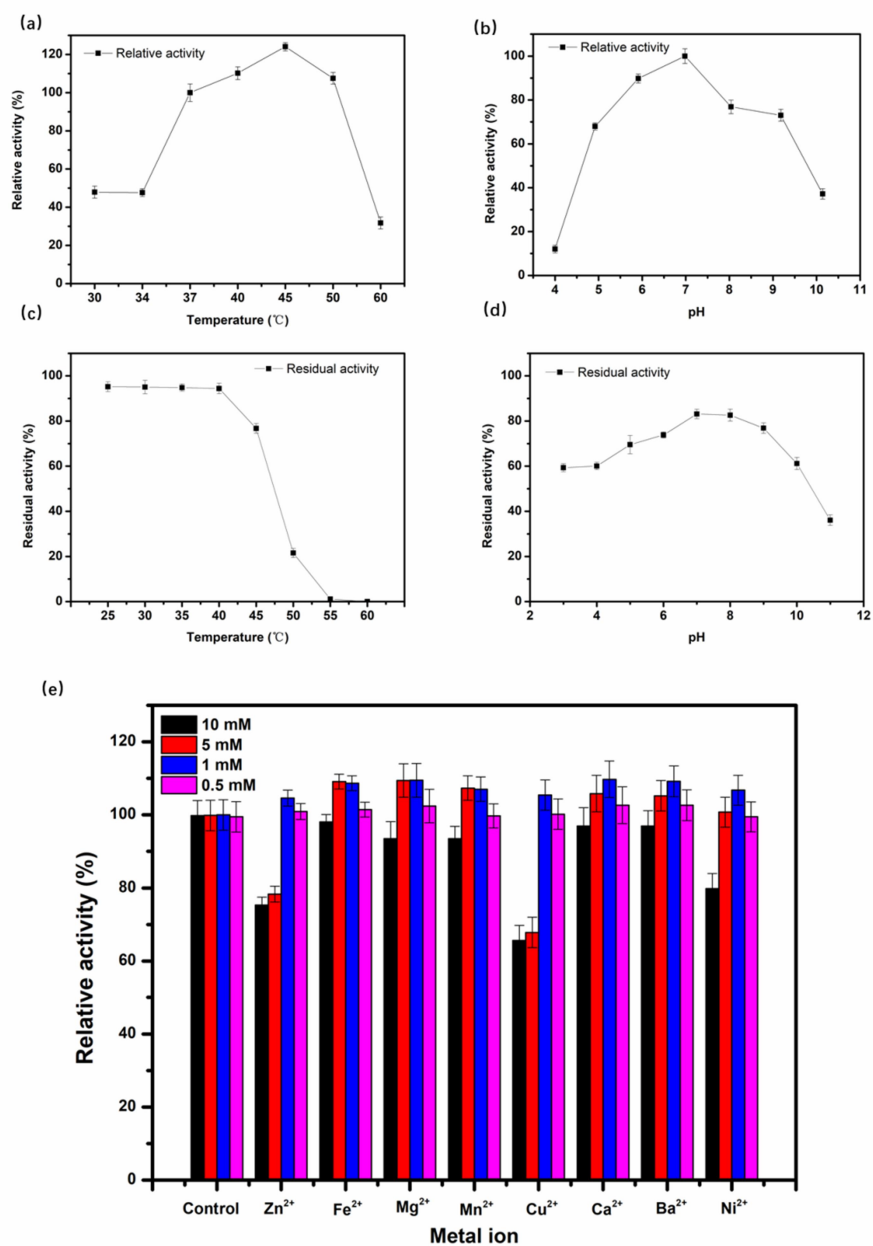

Biochemical properties of ReCDA. (a) Effect of temperature (30 °C to 60 °C) on enzymatic activity;

(b) Effect of pH (4.0 to 10.0) on enzymatic activity; (c) Effect of temperature on the stability of

ReCDA; (d) Effect of pH on the stability of ReCDA; (e) effect of metal ions on enzymatic activity.

To determine the optimum temperature, enzyme reaction was controlled under various temperatures (30-60 °C) for 60min. For the temperature stability, enzyme was pre-incubated at various



temperatures (25-60 °C) for 30 min without substrate. To determine the optimum pH, the enzyme reaction was performed in 0.2 M hydrogen phosphate-citric acid buffer (pH 4.0-8.0), 1/15 M phosphate buffer (pH 6.0-10) for 60 min. For the pH stability, the enzyme was pre-incubated in the various pH buffers at 4°C overnight <sup>5</sup>. For the effects of metal ions, the enzyme reaction was carried out in 0.2 M phosphate buffer (pH 7.0) mixed with different metal ions such as Zn<sup>2+</sup>, Fe<sup>2+</sup>, Mg<sup>2+</sup>, Mn<sup>2+</sup>, Cu<sup>2+</sup>, Ca<sup>2+</sup>, Ni<sup>2+</sup> (0.5-10 mM) <sup>6</sup>. The enzyme activity (157.6U/mL) detected at 37 °C and pH 7.0 without incubation was used as the standard (100%) to calculate the relative and residual activities.

## Supplementary data 5

The gene sequence of ReCDA

ATGTCCAAGAAGATCTACGTCAACTTCGGTGTGACGTCGATGCCGTCGCCGGCTGGCTCG  
GGTCGTACGGAGGCGAGGACTCGCCCGGCGACATCTCCCGCGGCCTCTTCGCAGGAGAGG  
TCGGCGTTCCGCGGCTGGTCAAGCTGTTTCGAGAAGTACGGCATCACGACGTCCTGGTTTCGT  
GCCCGGCCACTCGATCGAGACGTTCCCGCGGAGATCGAGCAGGTAGTCGCGGCCGGCCA  
CGAGATCGGCATCCACGGCTACAGCCACGAGAACCCGATCGCGATGACGCGTGAGCAGGA  
GACCGCGGTCCTCGACCGCTGCATCGAACTGATCGAGTCCTTCACGGGTTCGCAAGCCCACC  
GGTTACACGGCACCGTGGTGGGAGTTCTCCAAGGTCACCAACGAACTGCTGGTCGAGCGC  
GGCATCAAGTACGACCACTCGCTCATGCACAACGACTTCACGCCCTACTACGTCCGTGTCG  
GCGACTCCTGGACCAAGATCGACTACAGCCAGCCGGCCGAGACCTGGATGAAGCCGCTCG  
AGCGTGGCGCGGAGACCGACCTGGTTCGAGATTCCCGCGAACTGGTTGCTCGACGATCTGC  
CGCCGCAGATGTTTCATCAAGTCCAGCCCCAACAGCCACGGTTTTCGTCAGCCCGCGGCATCT  
CGAGGAGATGTGGCGCGACCAGTTCGACTGGGTCTACCGCGAGATGGACTATGCGATCTTC  
CCGATCACCATCCATCCCGACGTGTCCGGCCGTCCGCAGTCCCTGCTCATGCTCGAGCGCCT  
CATCGAGCACATCAACAAGCACGACGGGGTCGAGTGGGTACGTTTCGACCAGATGGCCGA  
CGACTTCAAGGAACGGTTCCCGCGCCGGAAGTGA

**Supplementary Table S3**

Chitin degrading enzymes in *R. equi* F6 identified by the CAZy database

| Function    | Enzymes                                     | Substrate                                                 | CAZy family | Number of genes |
|-------------|---------------------------------------------|-----------------------------------------------------------|-------------|-----------------|
|             | Chitin deacetylase                          | Chitin, Chitooligosaccharide, Peptidoglycan, Acetyl xylan | CE4         | 1               |
| Deacetylase | N-acetylglucosamine 6-phosphate deacetylase | N-acetylglucosamine 6-phosphate                           | CE9         | 2               |
|             | N-acetylglucosamine deacetylase             | N-acetylglucosamine                                       | CE11        | 4               |
|             | Diacetylchitobiose deacetylase              | Diacetylchitobiose                                        | CE14        | 16              |
|             | Chitinases of classes III and V             | Chitin                                                    | GH18        | 1               |
|             | Chitinases of classes I, II, and IV         | Chitin                                                    | GH19        | 3               |
| Hydrolase   | Modules of approx for chitinases            | Chitin                                                    | CBM12       | 6               |
|             | Modules of approx for chitinases            | Chitin                                                    | CBM14       | 3               |
|             | Modules of approx for chitinases            | Chitin, Peptidoglycan                                     | CBM50       | 15              |
